# Supplementary material
Source: PubMed Central journal article supplement (PMC2658005)
Supplement: NIHMS4199-supplement-01.pdf [file NIHMS4199-supplement-01.pdf]

**Suppl Table 1 : Correlation of *FTO* rs9939609 genotype with measures of quantitative traits in patients and non-diabetic control subjects**

|                 | Patients               |                        |                        |      |      |      | Controls               |                        |                        |      |      |                        |                        |                        |      |      |  |
|-----------------|------------------------|------------------------|------------------------|------|------|------|------------------------|------------------------|------------------------|------|------|------------------------|------------------------|------------------------|------|------|--|
|                 | Indo-Europeans         |                        |                        |      |      |      | Indo-Europeans         |                        |                        |      |      |                        | Dravidians             |                        |      |      |  |
|                 | Genotype               |                        |                        | p    | p1   | p2   | Genotype               |                        |                        | p    | p1   | Genotype               |                        |                        | p    | p1   |  |
|                 | TT                     | TA                     | AA                     |      |      |      | TT                     | TA                     | AA                     |      |      | TT                     | TA                     | AA                     |      |      |  |
| n               | 633                    | 613                    | 207                    |      |      |      | 678                    | 550                    | 133                    |      |      |                        | 435                    | 419                    | 107  |      |  |
| FPG (mmol/l)    | 8.56<br>(6.96-11.39)   | 8.44<br>(6.83-11.67)   | 8.50<br>(6.78-11.39)   | 0.19 | 0.39 | 0.42 | 5.06<br>(4.61-5.50)    | 5.60<br>(4.61-5.56)    | 5.11<br>(4.52-5.61)    | 0.13 | 0.35 | 5.49<br>(5.11-5.83)    | 5.55<br>(5.16-5.99)    | 5.38<br>(5.11-5.77)    | 0.61 | 0.09 |  |
| 2-h PG (mmol/l) | 13.33<br>(10.91-16.39) | 13.00<br>(10.32-16.19) | 13.44<br>(11.28-16.50) | 0.96 | 0.17 | 0.19 | 5.56<br>(4.71-6.72)    | 5.50<br>(4.50-6.61)    | 5.39<br>(4.39-7.22)    | 0.49 | 0.57 | 5.49<br>(5.11-5.83)    | 5.55<br>(5.16-5.99)    | 5.38<br>(5.11-5.77)    | 0.35 | 0.72 |  |
| FPI (pmol/l)    | --                     | --                     | --                     | --   | --   | --   | 32.5<br>(21.0-48.0)    | 219.0<br>(131.0-368.6) | 215.0<br>(142.3-425.0) | 0.95 | 0.94 | 42.4<br>(28.2-66.7)    | 48.5<br>(31.2-71.9)    | 44.3<br>(30.3-58.6)    | 0.14 | 0.02 |  |
| 2-h PI (pmol/l) | --                     | --                     | --                     | --   | --   | --   | 183.6<br>(104.0-348.9) | 164.4<br>(92.7-286.8)  | 168.0<br>(82.6-341.8)  | 0.82 | 0.19 | 234.2<br>(153.9-378.5) | 258.9<br>(172.4-397.5) | 218.3<br>(150.5-320.7) | 0.96 | 0.37 |  |
| TC (mmol/l)     | 4.17 (0.96)            | 4.22 (0.99)            | 4.15 (1.03)            | 0.91 | 0.63 | 0.61 | 3.95 (0.87)            | 3.87 (0.84)            | 3.89 (0.83)            | 0.19 | 0.39 | 4.28 (0.94)            | 4.33 (0.88)            | 4.32 (0.88)            | 0.51 | 0.84 |  |
| TG (mmol/l)     | 1.65 (1.13)            | 1.58 (0.98)            | 1.81 (1.46)            | 0.19 | 0.20 | 0.26 | 1.13 (0.89)            | 1.03 (0.73)            | 1.12 (0.67)            | 0.18 | 0.26 | 1.54 (1.08)            | 1.61 (1.24)            | 1.52 (1.19)            | 0.69 | 0.66 |  |
| HDLC (mmol/l)   | 1.06 (0.25)            | 1.06 (0.25)            | 1.05 (0.26)            | 0.61 | 0.85 | 0.85 | 1.06 (0.33)            | 1.07 (0.31)            | 1.07 (0.30)            | 0.66 | 0.86 | 1.06 (0.22)            | 1.07 (0.22)            | 1.05 (0.23)            | 0.92 | 0.53 |  |
| HOMA-R          | --                     | --                     | --                     | --   | --   | --   | 1.86 (1.96)            | 1.83 (1.84)            | 1.89 (1.81)            | 0.98 | 0.97 | 2.09 (1.51)            | 2.31 (1.62)            | 1.95 (1.28)            | 0.79 | 0.21 |  |

n, number of individuals; FPG, fasting plasma glucose; 2-h PG, 2-hour plasma glucose; FPI, fasting plasma insulin; 2-h PI, 2-hour plasma insulin; TC, plasma total cholesterol; TG, plasma triglycerides; HDLC, plasma HDL cholesterol; HOMA-R, Homeostasis model assessment of insulin resistance

Values are median (Inter Quartile Range) for FPG, 2-h PG, FPI and 2-h PI; mean (SD) for TC, TG, HDLC and HOMA-R; p by ANOVA; p1, adjusted for age and gender; p2, adjusted for age, gender and BMI
